# Supplementary material for: Mutation Drivers of Immunological Responses to Cancer
Source: Oxford University Press journal article supplement (doi:10.1158/2326-6066.cir-15-0233), 2016-07-12
Supplement: 23266066cir150233-sup-155513_3_supp_3523361_283z2j.xlsx [file 23266066cir150233-sup-155513_3_supp_3523361_283z2j.xlsx]

## Sheet: Sheet3
Supplementary Table S1 - Regions identified by domainXplorer as associated with changes in immune infiltrate
Columns are as follows:
Symbol: official gene symbol
Region: Region of the protein involved where ENSPXXXX is the protein isoform,
ND/PFXXX/IDR is the type of region (ND: new domain / PF: PFAM domain / IDR: disordered region)
and the numbers are the coordinates of the start and end of the region
p1: p value of the linear regression model
p2: p value of the wilcoxon test comparing samples with mutations in the region and samples with no mutations in the protein
p3: p value of the wilcoxon test comparing samples with mutations in the region and samples with other mutations in the protein
Mean F: Mean ESTIMATE immune score in samples with mutations in the region
Mean OG: Mean ESTIMATE immune score in samples with mutations in the other regions of the gene
Mean WT: Mean ESTIMATE immune score in samples with no mutations in the protein
Symbol	Region	p1	p2	p3	Mean R	Mean OG	Mean WT	FDR
ABCA13	ENSP00000411096-ND-3027-3219	0.000213006	9.68235e-06	0.000206853	1323.26	401.233	210.761	0.16
ADAMTS6	ENSP00000370443-PF05986-718-829	0.00874553	0.000923271	0.0344751	1257	577.288	217.667	0.4
AGAP3	ENSP00000380413-PF00071-129-285	0.000949018	0.00283142	0.0251858	1515.17	530.47	221.014	0.23
AKAP9	ENSP00000351922-IDR-122-480	0.00115153	0.000314506	0.032198	1007.5	562.95	212.967	0.26
ANK3	ENSP00000280772-IDR-4325-4377	0.00496726	0.00479019	0.0163933	1518.2	460.537	212.014	0.36
ANTXR1	ENSP00000301945-PF05586-396-489	0.00116753	0.00408965	0.0222278	1366.62	332.235	221.934	0.26
ASUN	ENSP00000261191-IDR-502-706	0.00448357	0.00406488	0.0268555	1356.29	305.252	223.084	0.36
BPTF	ENSP00000315454-ND-833-976	0.00131738	0.000117233	0.0048093	1260.42	502.984	216.071	0.26
BRPF3	ENSP00000350267-IDR-685-733	0.00857646	0.00534132	0.0108414	1774.29	332.509	222.662	0.4
C1orf106	ENSP00000356311-IDR-387-437	0.00195897	0.00073942	0.000975083	1670.96	-14.0218	225.958	0.29
C2	ENSP00000299367-PF00092-254-452	0.00233748	0.000731291	0.0227521	1201.35	446.093	220.893	0.3
C2CD5	ENSP00000443204-PF00168-5-89	0.000741532	0.00824041	0.00587478	1807.5	237.827	223.717	0.23
C6orf170	ENSP00000275159-ND-162-390	0.00366939	0.00149153	0.0119504	1160.6	348.74	221.403	0.34
C7orf63	ENSP00000373948-IDR-817-875	0.00222553	0.00862233	0.00727143	1310.32	241.053	223.205	0.3
C9orf3	ENSP00000364464-IDR-665-725	6.78474e-05	0.00429998	0.00698287	2402.67	588.357	220.705	0.11
CAPN9	ENSP00000271971-PF00648-42-337	0.00177781	0.000586942	0.0146951	1147.28	246.005	221.547	0.28
CD163L1	ENSP00000393474-PF00530-168-264	0.0026474	0.00331407	0.027575	1416.49	588.519	213.468	0.31
CDH11	ENSP00000268603-IDR-703-762	0.00182399	0.000241186	0.00597682	1574.65	535.149	218.563	0.28
CEP170	ENSP00000355500-IDR-889-1056	0.000488922	0.00133597	0.00871526	1581.23	482.773	219.88	0.2
CFTR	ENSP00000003084-PF00664-84-350	0.00452623	0.000303244	0.00668254	1107.59	367.934	218.558	0.36
CHD3	ENSP00000369716-IDR-1560-1783	0.00232618	0.00191982	0.044341	1242.68	536.467	218.132	0.3
COL11A1	ENSP00000351163-PF01391-1441-1499	0.00803028	0.00824468	0.0203339	1243.41	396.51	215.325	0.39
COL1A2	ENSP00000297268-PF01391-91-149	3.70135e-05	0.000941961	0.00225215	1782.71	416.262	218.663	0.1
COL2A1	ENSP00000369889-PF00093-34-89	0.00304936	0.00669084	0.0138427	1454.72	409.664	220.618	0.32
COL4A6	ENSP00000361290-PF01391-492-547	0.00975542	0.0040782	0.0158781	1761.49	442.52	219.653	0.4
DIDO1	ENSP00000378752-IDR-508-589	0.000723733	0.0017801	0.0415919	1146.57	542.453	212.92	0.23
DMBT1	ENSP00000357905-PF00530-996-1093	0.00747585	0.00084047	0.0435575	1045.64	535.762	211.273	0.39
DMBT1	ENSP00000357905-PF00431-1766-1874	0.00194149	0.00381757	0.0406847	1399.93	561.785	211.273	0.29
DNAH9	ENSP00000262442-PF08393-1290-1703	0.00940484	3.54794e-06	0.00382596	958.319	437.071	206.497	0.4
DNAJB7	ENSP00000307197-IDR-186-309	5.22738e-06	0.000593658	0.0120664	1734.09	363.762	222.391	0.04
DNMBP	ENSP00000344914-IDR-315-463	0.00104429	0.00120369	0.00529558	1660.96	455.828	220.53	0.25
DUSP15	ENSP00000278979-PF00782-9-135	0.00168069	0.00226057	0.0224775	1589.72	468.233	222.971	0.28
DUXA	ENSP00000452398-IDR-134-204	0.00706342	0.00147193	0.0032434	1639.24	230.906	223.37	0.38
DZIP3	ENSP00000419981-IDR-595-849	0.00685068	0.00298277	0.0268151	822.532	310.946	221.862	0.38
EDNRA	ENSP00000315011-IDR-393-427	0.00479116	0.00196164	0.0193621	1780.53	233.6	223.495	0.36
EPC1	ENSP00000263062-PF06752-582-836	5.09902e-05	0.000452493	0.0104582	1363.02	757.311	219.447	0.1
F2	ENSP00000308541-PF00089-364-613	0.00673435	0.00444507	0.0243336	1245.91	215.862	223.285	0.37
FAM221A	ENSP00000342576-IDR-249-298	2.10743e-05	0.00694204	0.0392857	2611.25	596.54	222.705	0.07
FCGR2A	ENSP00000271450-IDR-257-317	0.000304677	0.00071957	0.00268327	1661.28	174.644	222.974	0.18
FILIP1	ENSP00000237172-IDR-147-255	0.000190767	0.000753974	0.00871072	1427.58	450.603	218.778	0.16
FLG	ENSP00000357789-IDR-33-54	0.000967582	0.00403592	0.012878	1858.65	479.672	195.352	0.24
GLCE	ENSP00000261858-PF06662-416-607	0.00343117	0.00142343	0.00326126	1213.96	56.0824	223.443	0.34
GLYR1	ENSP00000322716-IDR-66-195	0.00744712	0.00330967	0.0057667	1355.53	304.824	223.167	0.39
GPR113	ENSP00000307831-PF00002-769-1016	0.00147405	0.00667288	0.00603989	1768.53	222.982	223.841	0.27
GPR158	ENSP00000365529-IDR-1112-1171	0.00375824	0.001417	0.00975616	1526.66	557.223	214.346	0.34
GRAP2	ENSP00000385607-PF07653-276-328	0.00374005	0.000437584	0.000997264	1754	378.248	222.384	0.34
GRAP2	ENSP00000385607-PF00018-277-322	0.00686423	0.000635271	0.000781827	1887.08	407.112	222.384	0.38
HMCN1	ENSP00000271588-PF00090-4647-4697	0.00378346	0.00781206	0.0262948	1355.8	416.118	211.416	0.34
HRAS	ENSP00000407586-PF00009-45-162	0.00939328	1.08713e-06	3.17579e-06	-419.664	687.891	228.818	0.4
IGSF22	ENSP00000421191-PF00041-807-888	0.00401101	0.00697654	0.0172117	2017.2	725.001	218	0.34
IGSF9	ENSP00000357073-PF07679-426-502	0.00377343	0.00407649	0.0146237	1176.93	275.594	222.56	0.34
INADL	ENSP00000360200-IDR-636-688	0.00445288	0.00592613	0.0200896	1677.23	517.113	217.47	0.35
JMJD1C	ENSP00000382204-ND-1-247	0.0095616	0.00163917	0.00446279	1374.12	357.587	220.919	0.4
KANSL1	ENSP00000262419-ND-588-685	0.00672328	0.00248052	0.0134175	1302.98	329.745	222.593	0.38
KATNAL2	ENSP00000348478-IDR-80-173	0.00180199	0.00477679	0.0239507	1853.26	428.561	222.698	0.28
KCNH5	ENSP00000321427-IDR-778-904	0.00803364	0.000195828	0.0042456	1150.78	447.287	217.373	0.39
KCNMB4	ENSP00000258111-IDR-97-152	2.93697e-05	0.0030977	0.00879121	2856.3	524.647	222.803	0.09
KIAA0586	ENSP00000346359-ND-771-828	0.00140831	0.00475971	0.00862235	2268.79	414.924	221.826	0.27
KIF5C	ENSP00000393379-PF00225-35-327	0.0050816	0.00330549	0.0054553	987.799	143.02	223.727	0.36
KLHL13	ENSP00000443191-PF01344-381-431	0.000947368	0.00180156	0.0118334	1763.25	557.445	219.51	0.24
KRT27	ENSP00000301656-IDR-415-459	0.0021168	0.00929167	0.00168905	1420.7	110.631	224.382	0.3
LAMA1	ENSP00000374309-PF02210-2514-2653	0.00691789	0.000675685	0.0454417	998.182	544.709	210.447	0.38
LAMA1	ENSP00000374309-PF00054-2514-2657	0.00691789	0.000675685	0.0454417	998.182	544.709	210.447	0.38
LGI2	ENSP00000371548-PF03736-360-402	0.000190587	0.00355898	0.00178268	1952.18	308.032	223.036	0.16
LRP4	ENSP00000367888-IDR-53-383	0.000799273	0.00068285	0.0180442	1062.85	431.561	218.339	0.23
MACF1	ENSP00000455823-IDR-2190-2303	0.000339869	0.00153443	0.00431941	2063.05	494.986	210.688	0.18
MAML1	ENSP00000292599-IDR-27-150	0.00126672	0.00584794	0.0294648	1857.11	662.213	220.947	0.26
MAN1B1	ENSP00000441398-PF01532-231-609	4.52625e-05	0.000218337	0.00174825	1451.24	6.50969	222.907	0.1
MAP10	ENSP00000403208-IDR-923-1015	0.00975781	0.000655605	0.0023023	1515.54	572.297	220.21	0.4
MAP1B	ENSP00000296755-IDR-512-782	0.00168951	0.00454738	0.0237104	1047.62	373.169	220.48	0.28
MBD5	ENSP00000384672-IDR-633-683	0.00388638	0.00463648	0.0110427	2278.47	470.726	219.161	0.34
MUC17	ENSP00000302716-IDR-4434-4462	0.00086858	0.00618879	0.0219262	1813.3	497.37	198.592	0.24
MYLK	ENSP00000353452-IDR-836-1000	0.00108539	0.000575897	0.0188994	1165.9	489.483	216.951	0.25
NGFR	ENSP00000172229-IDR-145-214	0.00695063	0.00656737	0.0101078	1507.99	35.7666	224.596	0.38
NOS1	ENSP00000337459-PF00595-18-94	0.00672626	0.00454535	0.0111663	850.998	283.173	221.67	0.38
NPAS4	ENSP00000311196-IDR-698-802	0.00633894	0.00395704	0.01572	1282.66	382.376	220.565	0.38
PASD1	ENSP00000359382-IDR-609-660	0.00348787	0.00120855	0.0131215	1786.44	594.8	217.895	0.34
PCNT	ENSP00000352572-IDR-1635-1758	0.00174845	0.00278911	0.00847299	1494.73	445.807	217.174	0.28
PGM2	ENSP00000371393-PF02879-228-333	0.000961575	0.00104858	0.0102932	1494.33	455.115	221.934	0.24
PKD1L1	ENSP00000289672-IDR-1029-1102	0.000470279	0.00245041	0.00990165	1683.82	499.056	213.302	0.2
PKD2L2	ENSP00000424725-IDR-507-597	0.000520184	0.00486315	0.0365178	1757.78	676.764	221.342	0.2
PLCZ1	ENSP00000266505-PF00388-157-300	0.00576193	0.000943351	0.00454462	1372.96	355.818	221.252	0.37
PLEKHS1	ENSP00000358316-IDR-175-310	0.00568412	0.000476862	0.0177912	1322.55	382.344	221.609	0.37
PLG	ENSP00000308938-PF09342-590-703	0.0001129	2.79607e-05	0.00436138	1612.24	685.429	215.414	0.12
PLG	ENSP00000308938-PF00089-582-803	0.000574821	1.60244e-05	0.0227815	1230.55	647.02	215.414	0.21
POLR3B	ENSP00000228347-PF00562-667-1041	0.00500178	0.000463405	0.0067414	1037.14	302.402	221.342	0.36
POLR3B	ENSP00000228347-PF04560-1043-1128	0.00483906	0.00346729	0.00137813	-1073.35	632.284	221.342	0.36
PPARGC1A	ENSP00000264867-ND-1-114	0.00288447	0.000605586	0.00337324	1949.19	590.498	219.334	0.32
PPARGC1A	ENSP00000264867-IDR-1-156	0.00573899	0.000571924	0.0170136	1378.09	569.272	219.334	0.37
PPP1R3A	ENSP00000284601-IDR-1017-1054	0.00144276	0.000900869	0.00341595	1505.56	369.106	219.18	0.27
PTPN22	ENSP00000352833-IDR-730-807	0.00605213	0.004159	0.00794676	1858.44	376.028	222.158	0.38
PXDNL	ENSP00000348645-PF07679-330-415	0.00837816	0.00228959	0.0125705	1083.71	419.973	214.936	0.39
QSER1	ENSP00000382241-IDR-1063-1166	0.0036848	0.00231571	0.0140847	1594.82	440.105	220.632	0.34
RILP	ENSP00000301336-IDR-307-401	0.000791966	0.00125288	0.00505051	1901.66	-185.895	223.965	0.23
RNF123	ENSP00000328287-ND-276-466	0.00189158	0.00423984	0.0488032	1382.68	534.272	220.665	0.29
ROBO4	ENSP00000304945-PF07679-32-123	0.00387016	0.00158885	0.00632708	1442.46	510.819	219.484	0.34
SH2D3A	ENSP00000245908-ND-271-354	0.00275904	0.00326521	0.0361848	1667.43	626.204	222.148	0.21
SMEK2	ENSP00000339769-ND-360-509	0.00309558	0.00136219	0.00115895	1485.09	243.812	222.937	0.32
SOGA3	ENSP00000455908-IDR-1-102	0.000960023	0.0031935	0.0043818	1891.7	309.892	222.814	0.24
SOX17	ENSP00000297316-IDR-57-164	0.000746137	0.00581377	0.0359523	-675.72	393.436	226.347	0.24
SPATA13	ENSP00000371542-IDR-434-644	0.000242263	0.00264063	0.00166317	1537.4	108.042	223.814	0.17
SPEF2	ENSP00000348314-IDR-474-530	0.000566205	0.00842165	0.0328416	1958.8	747.684	209.425	0.21
SPG7	ENSP00000268704-PF07728-346-459	0.00852343	0.00485071	0.023381	1475.62	397.294	223.113	0.4
SPTA1	ENSP00000357130-PF00018-984-1028	0.00348379	8.52143e-05	0.0036313	1442.68	542.075	199.071	0.34
SPTA1	ENSP00000357130-PF07653-984-1032	0.00705198	0.000100636	0.00550225	1359.79	542.344	199.071	0.38
SPTAN1	ENSP00000350882-PF00435-468-570	0.0076299	0.00251428	0.0115026	1430.7	419.45	219.834	0.38
STAT4	ENSP00000376134-IDR-140-193	0.00169207	0.00343982	0.0276625	1423.72	443.723	221.032	0.28
SYT14	ENSP00000389039-PF00168-322-406	0.00647191	0.00527982	0.0474934	1413.69	578.337	221.715	0.38
TACC2	ENSP00000358001-ND-2461-2552	0.000234001	0.00908811	0.0187795	2314.83	534.38	215.096	0.17
TACC2	ENSP00000358001-IDR-2486-2563	0.000143283	0.00593602	0.0118114	2434.72	531.829	215.096	0.14
TMTC3	ENSP00000266712-PF00515-446-479	0.0014274	0.00718002	0.0165697	1724.6	410.379	222.194	0.27
TRERF1	ENSP00000439689-IDR-240-428	0.00898289	0.00214886	0.023862	1296.01	480.897	219.719	0.4
TUBGCP3	ENSP00000261965-PF04130-251-763	0.00904164	8.6476e-05	0.00425033	904.453	182.585	221.474	0.4
UBE3B	ENSP00000391529-ND-57-403	0.00183587	0.00113577	0.018192	944.729	286.631	221.575	0.28
VWA2	ENSP00000376708-PF00092-51-208	0.000660651	0.00399266	0.0486696	1371	510.728	221.685	0.22
ZNF14	ENSP00000340514-PF01352-4-44	0.00436443	0.00969574	0.0109402	2034.31	355.677	223.367	0.35
ZNF280D	ENSP00000267807-IDR-535-633	0.00518972	0.00341252	0.00294772	1939.62	548.26	221.934	0.36
ZNF415	ENSP00000388787-IDR-109-200	0.00799787	0.00601156	0.0162743	1483.88	448.862	222.1	0.39
ZNF462	ENSP00000414570-IDR-512-647	0.00878812	0.00890671	0.0129245	1565.38	365.633	221.167	0.4
ZNF483	ENSP00000311679-IDR-121-173	0.0004393	0.00611216	0.00166113	2175.55	576.949	221.073	0.2
ZNF626	ENSP00000469958-PF00096-341-363	0.00187278	0.00357405	0.00175232	1897.6	129.551	224.424	0.28
ZNF74	ENSP00000349098-IDR-344-461	0.00207809	0.000947225	0.015558	1815	529.132	222.184	0.3
